# Supplementary material for: HIV-1 capsid is involved in post-nuclear entry steps
Source: PubMed Central journal article supplement (PMC4842275; doi:10.1186/s12977-016-0262-0), 2016-04-23
Supplement: 12977_2016_262_MOESM5_ESM.pdf [file 12977_2016_262_MOESM5_ESM.pdf]

WT

N74D

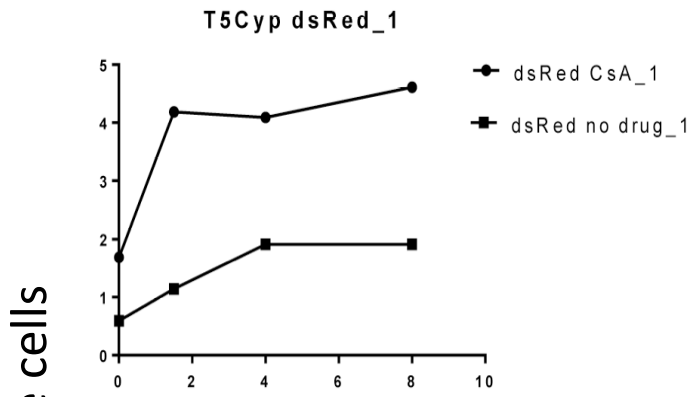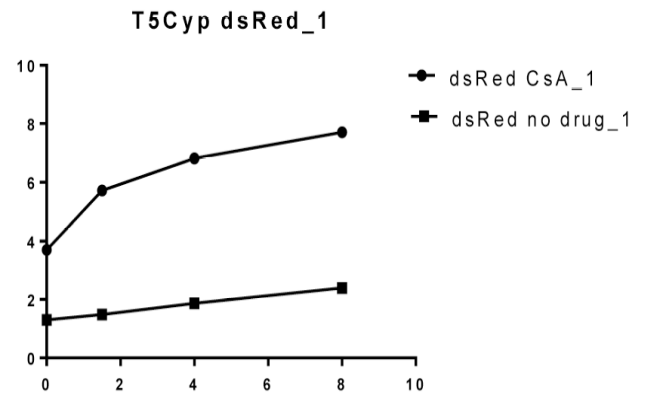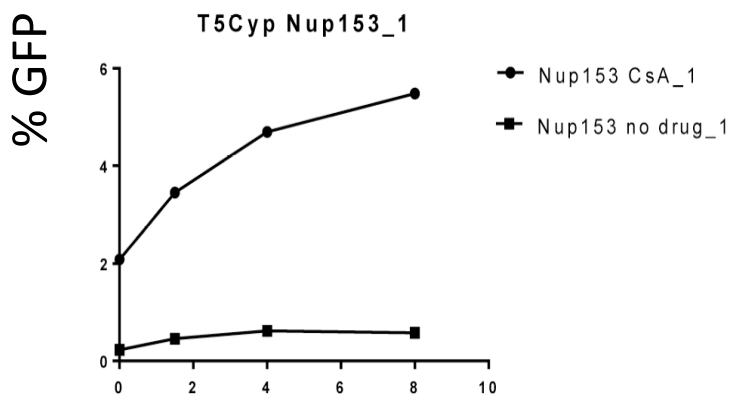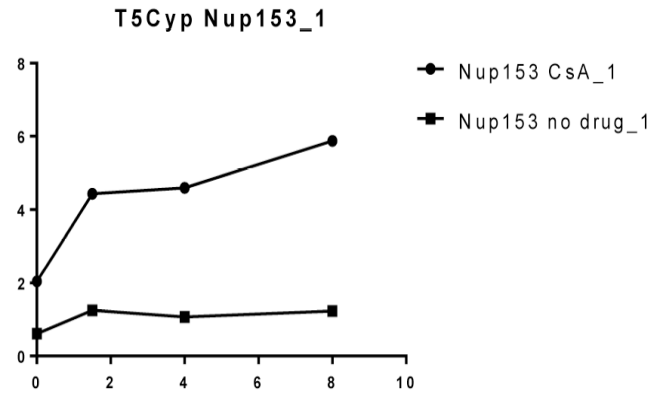

Time of Washout (hr)

WT

N74D

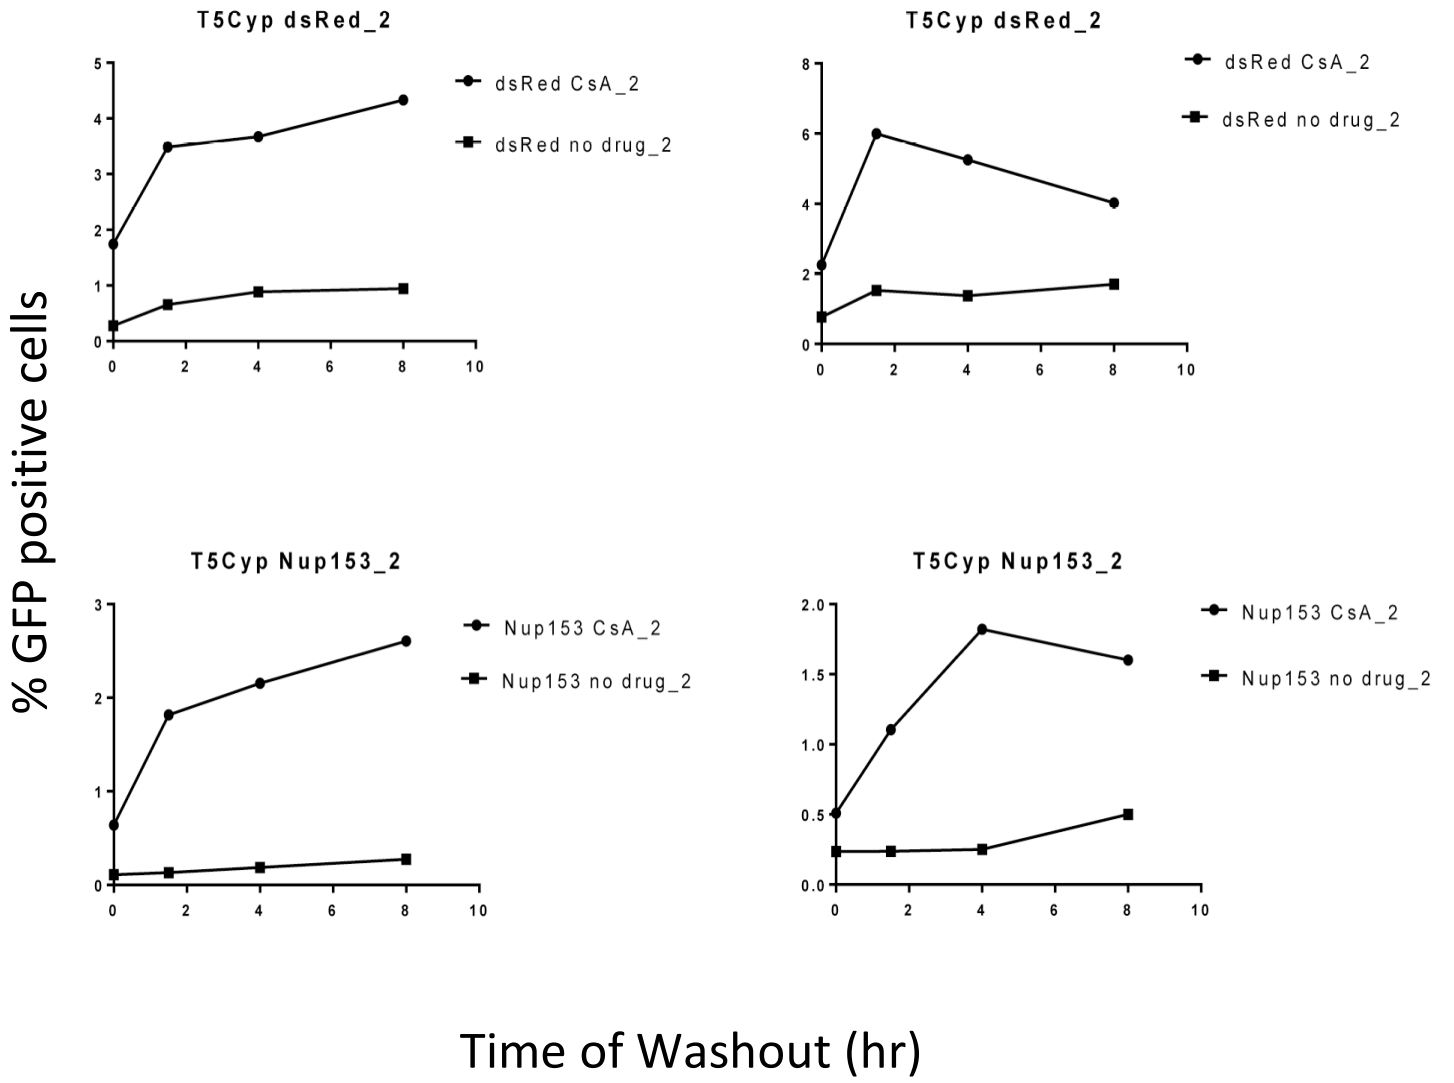

WT

N74D

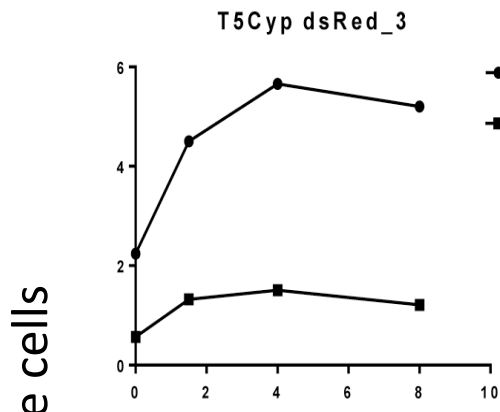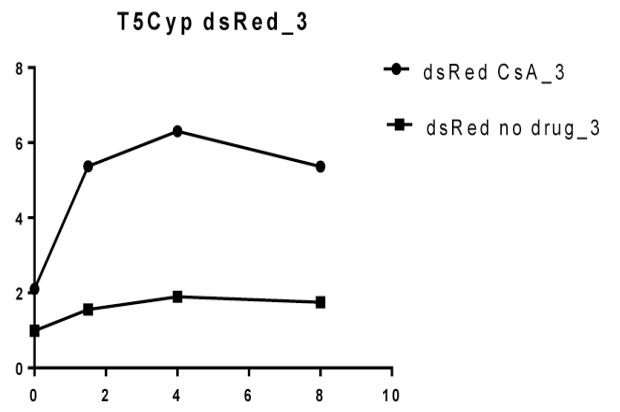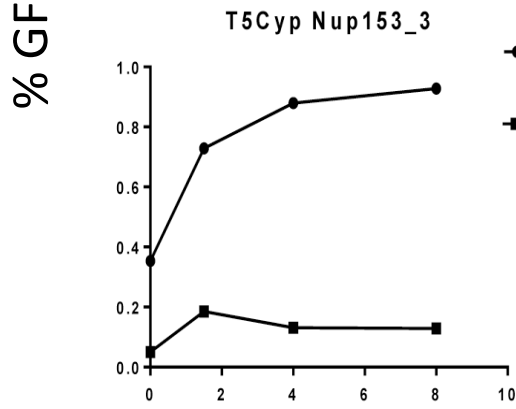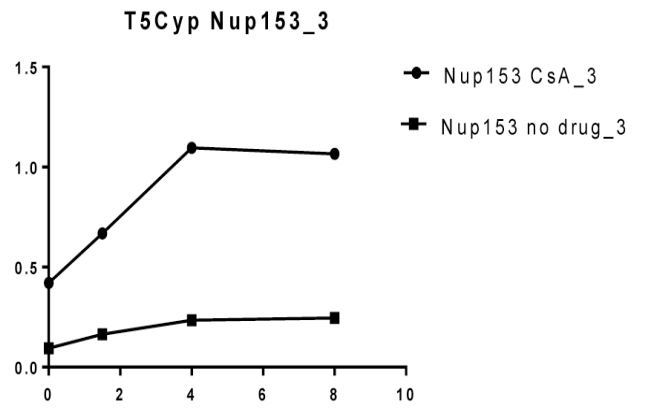

Time of Washout (hr)
